# Supplementary material for: Facile synthesis of superparamagnetic Fe3O4@noble metal core–shell nanoparticles by thermal decomposition and hydrothermal methods: comparative study and catalytic applications
Source: Royal Society of Chemistry journal article supplement (doi:10.1039/d0ra08230a), 2020-12-24
Supplement: d0ra08230a1.pdf [file d0ra08230a1.pdf]

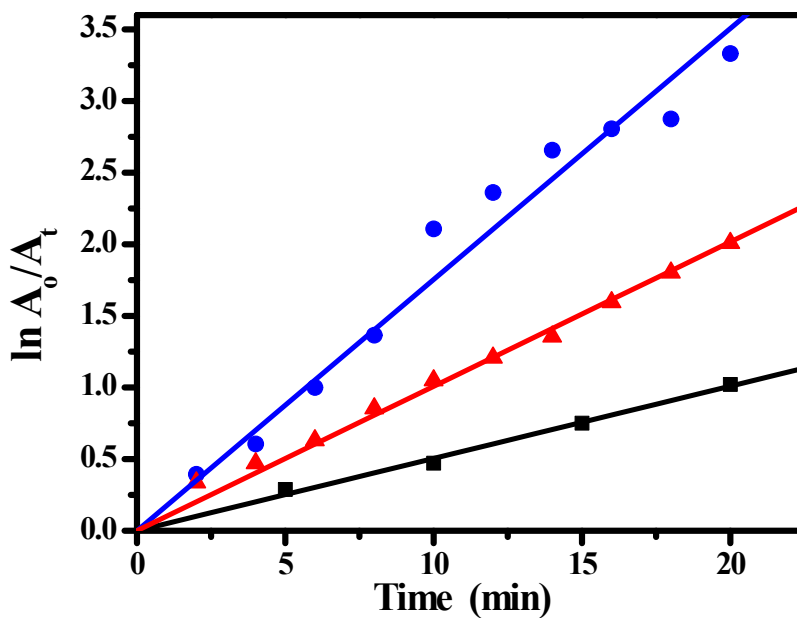

**Fig. S1.** Pseudo first-order plots for catalytic degradation of CR dye, in the presence of  $\text{NaBH}_4$ , and the nanocatalysts,  $\text{Fe}_3\text{O}_4$ ,  $\text{Fe}_3\text{O}_4@\text{Ag}$  and  $\text{Fe}_3\text{O}_4@\text{Au}$ .

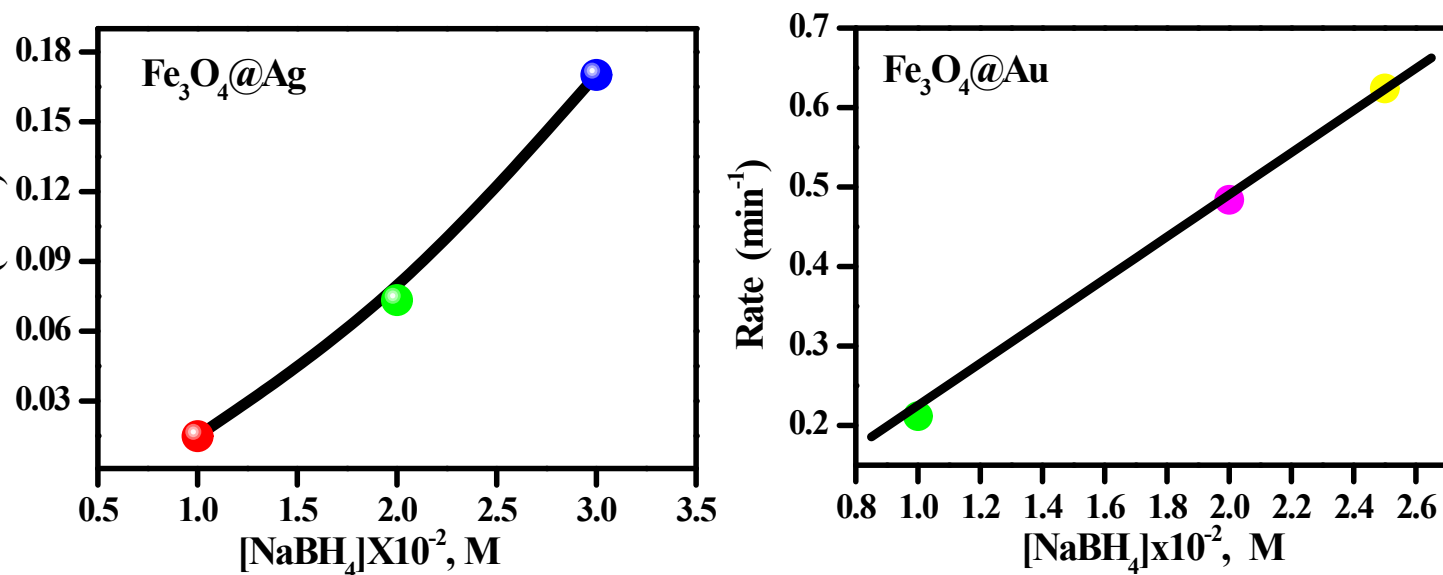

**Fig.S2.** The effect of  $\text{NaBH}_4$  concentrations on reaction rate,  $[\text{CR}] = 5.0 \times 10^{-5}\text{M}$ , and the amount of catalyst = 2

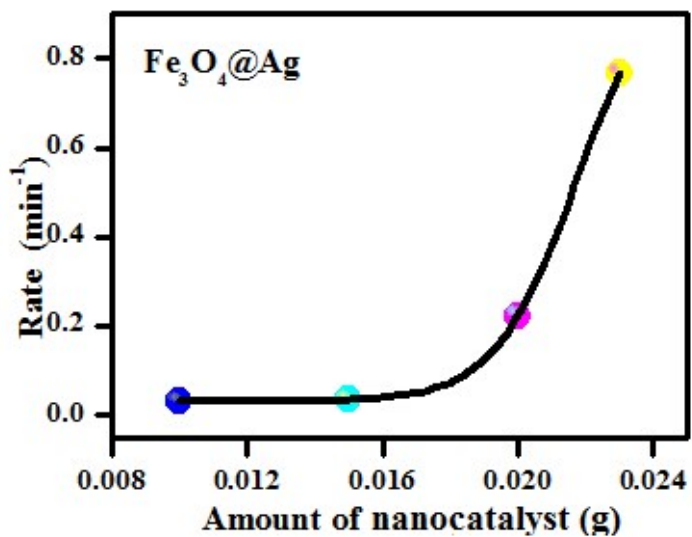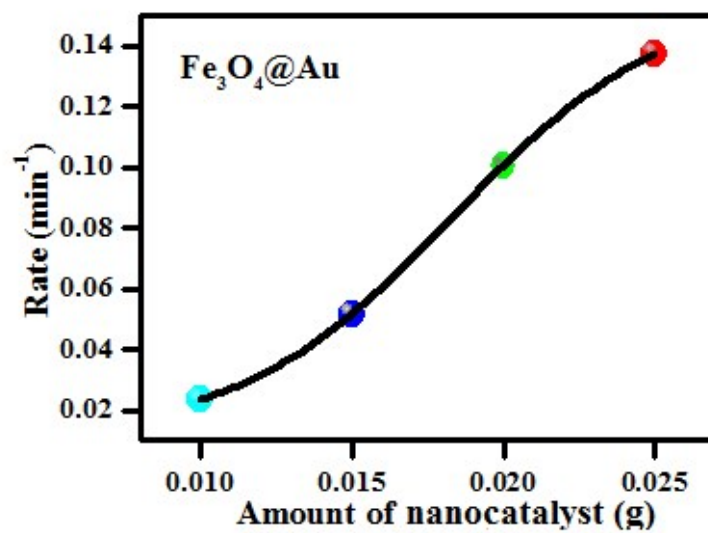

**Figure S3** .The effect of nanocatalyst dose on the reaction rate,  $[\text{NaBH}_4] = 2.5 \times 10^{-2} \text{ M}$ , and  $[\text{CR}] = 5.0 \times 10^{-5} \text{ M}$ .
